# Supplementary material for: The ApaH-like phosphatase TbALPH1 is the major mRNA decapping enzyme of trypanosomes
Source: PubMed Central journal article supplement (PMC5491325; doi:10.1371/journal.ppat.1006456), 2017-06-19
Supplement: ppat.1006456.s002.pdf [file ppat.1006456.s002.pdf]

Figure S2

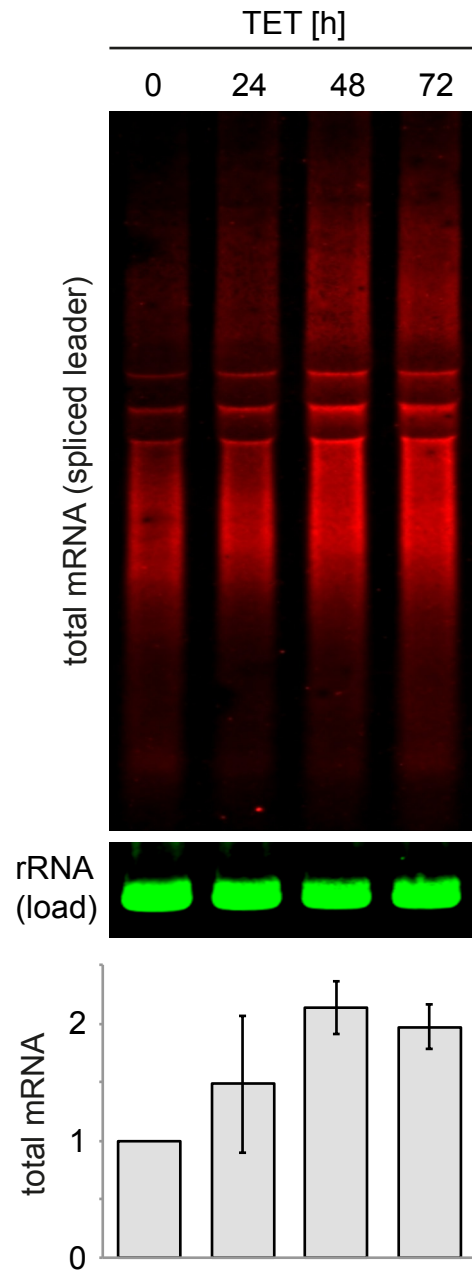

**Figure S2: Increase in total mRNAs after tetracycline (TET) inducible RNAi depletion of XRNA.** The data are averages from three independent clonal cell lines, standard deviations are indicated by error bars. One representative northern blot is shown.
