# Supplementary material for: The ApaH-like phosphatase TbALPH1 is the major mRNA decapping enzyme of trypanosomes
Source: PubMed Central journal article supplement (PMC5491325; doi:10.1371/journal.ppat.1006456), 2017-06-19
Supplement: ppat.1006456.s005.pdf [file ppat.1006456.s005.pdf]

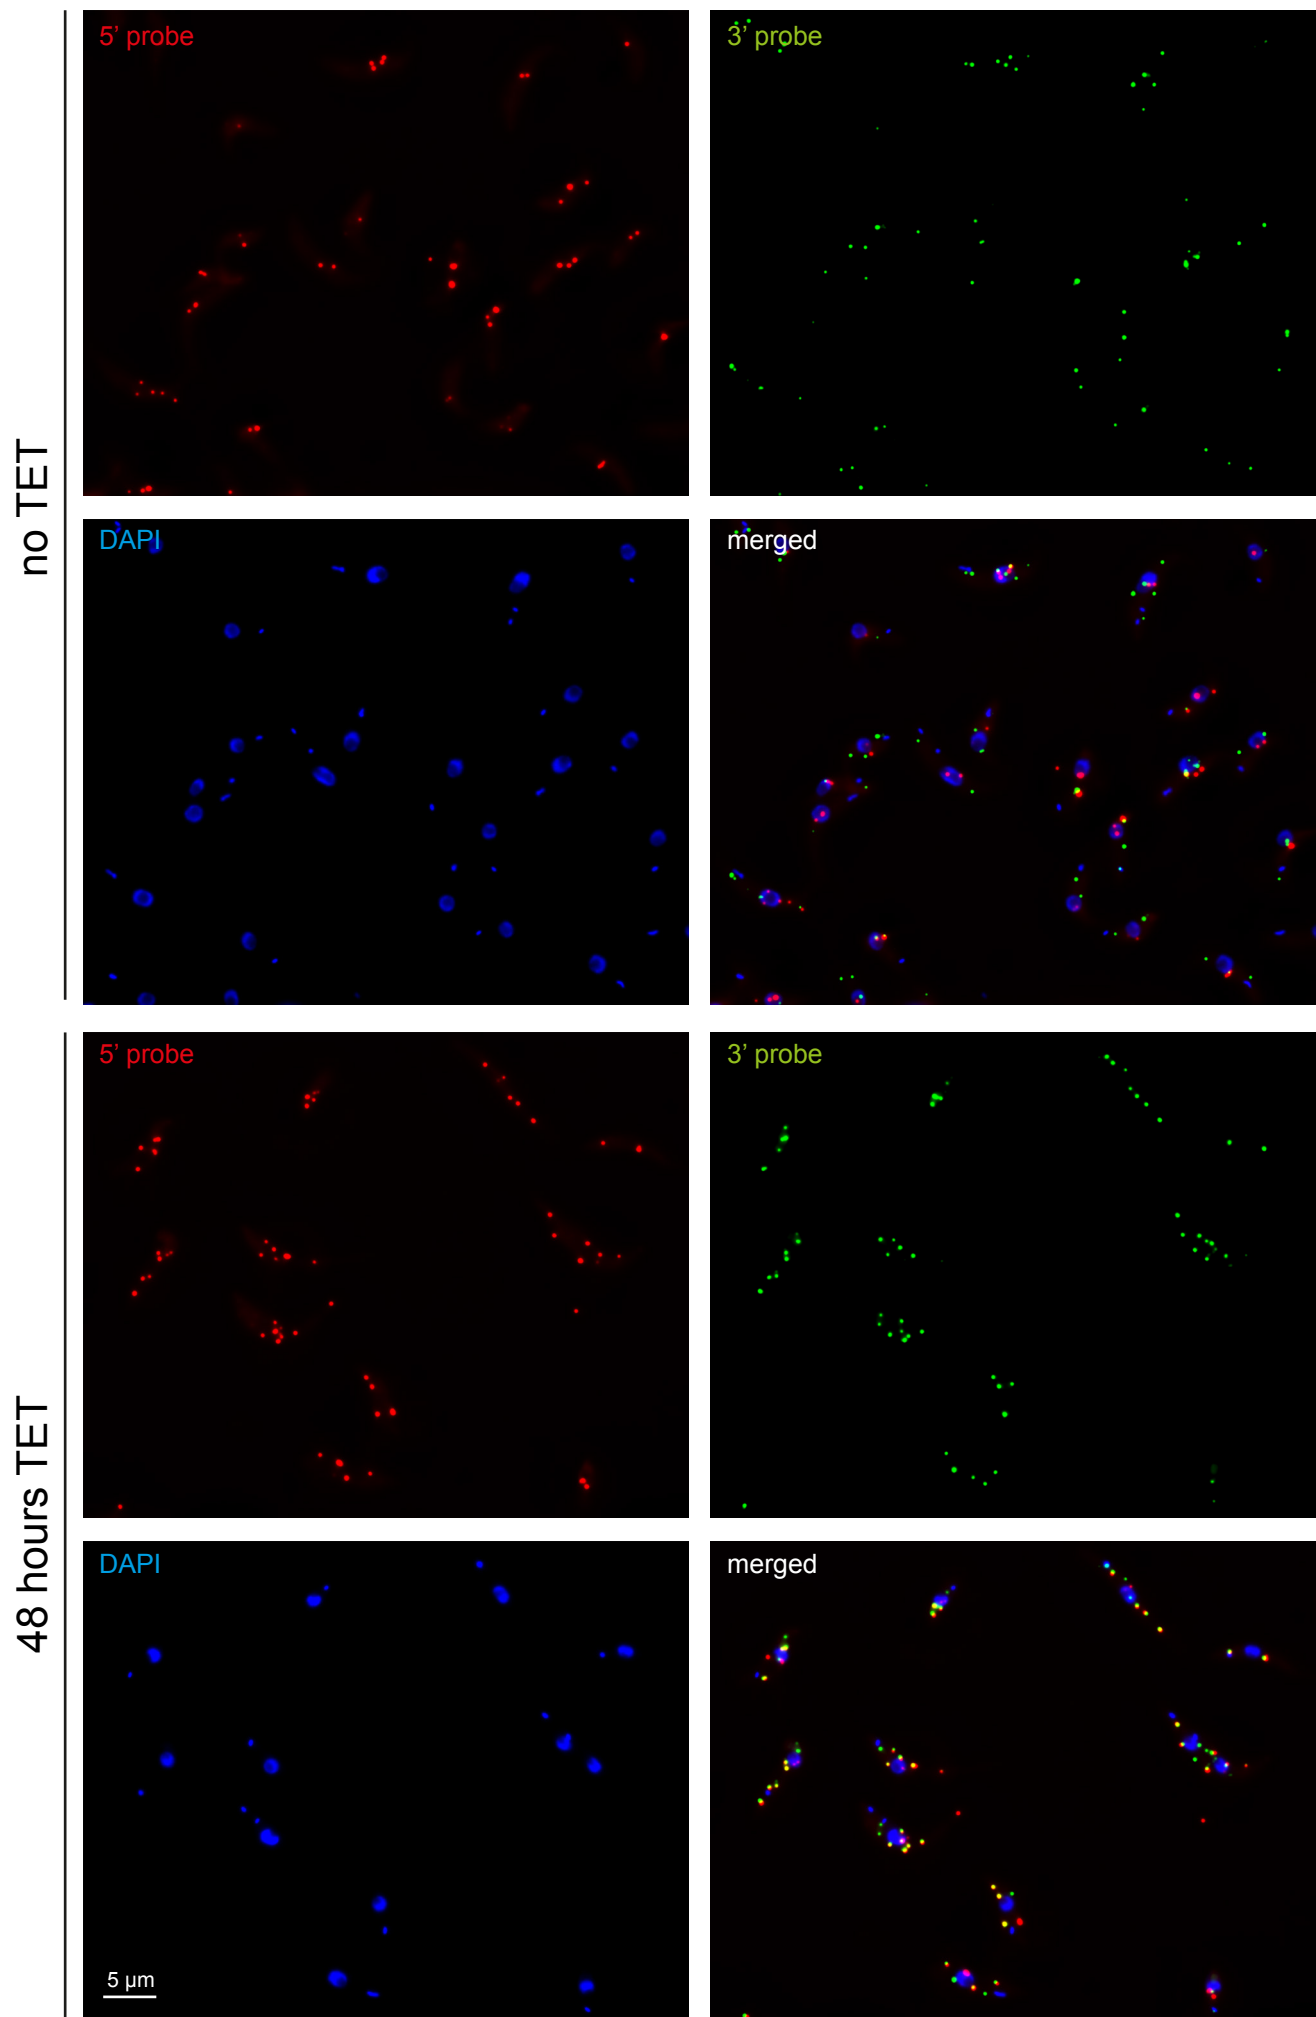

Figure S5: mRNA decay was monitored after 0 and 48 hours RNAi depletion of ALPH1.
