# Supplementary material for: The ApaH-like phosphatase TbALPH1 is the major mRNA decapping enzyme of trypanosomes
Source: PubMed Central journal article supplement (PMC5491325; doi:10.1371/journal.ppat.1006456), 2017-06-19
Supplement: ppat.1006456.s007.pdf [file ppat.1006456.s007.pdf]

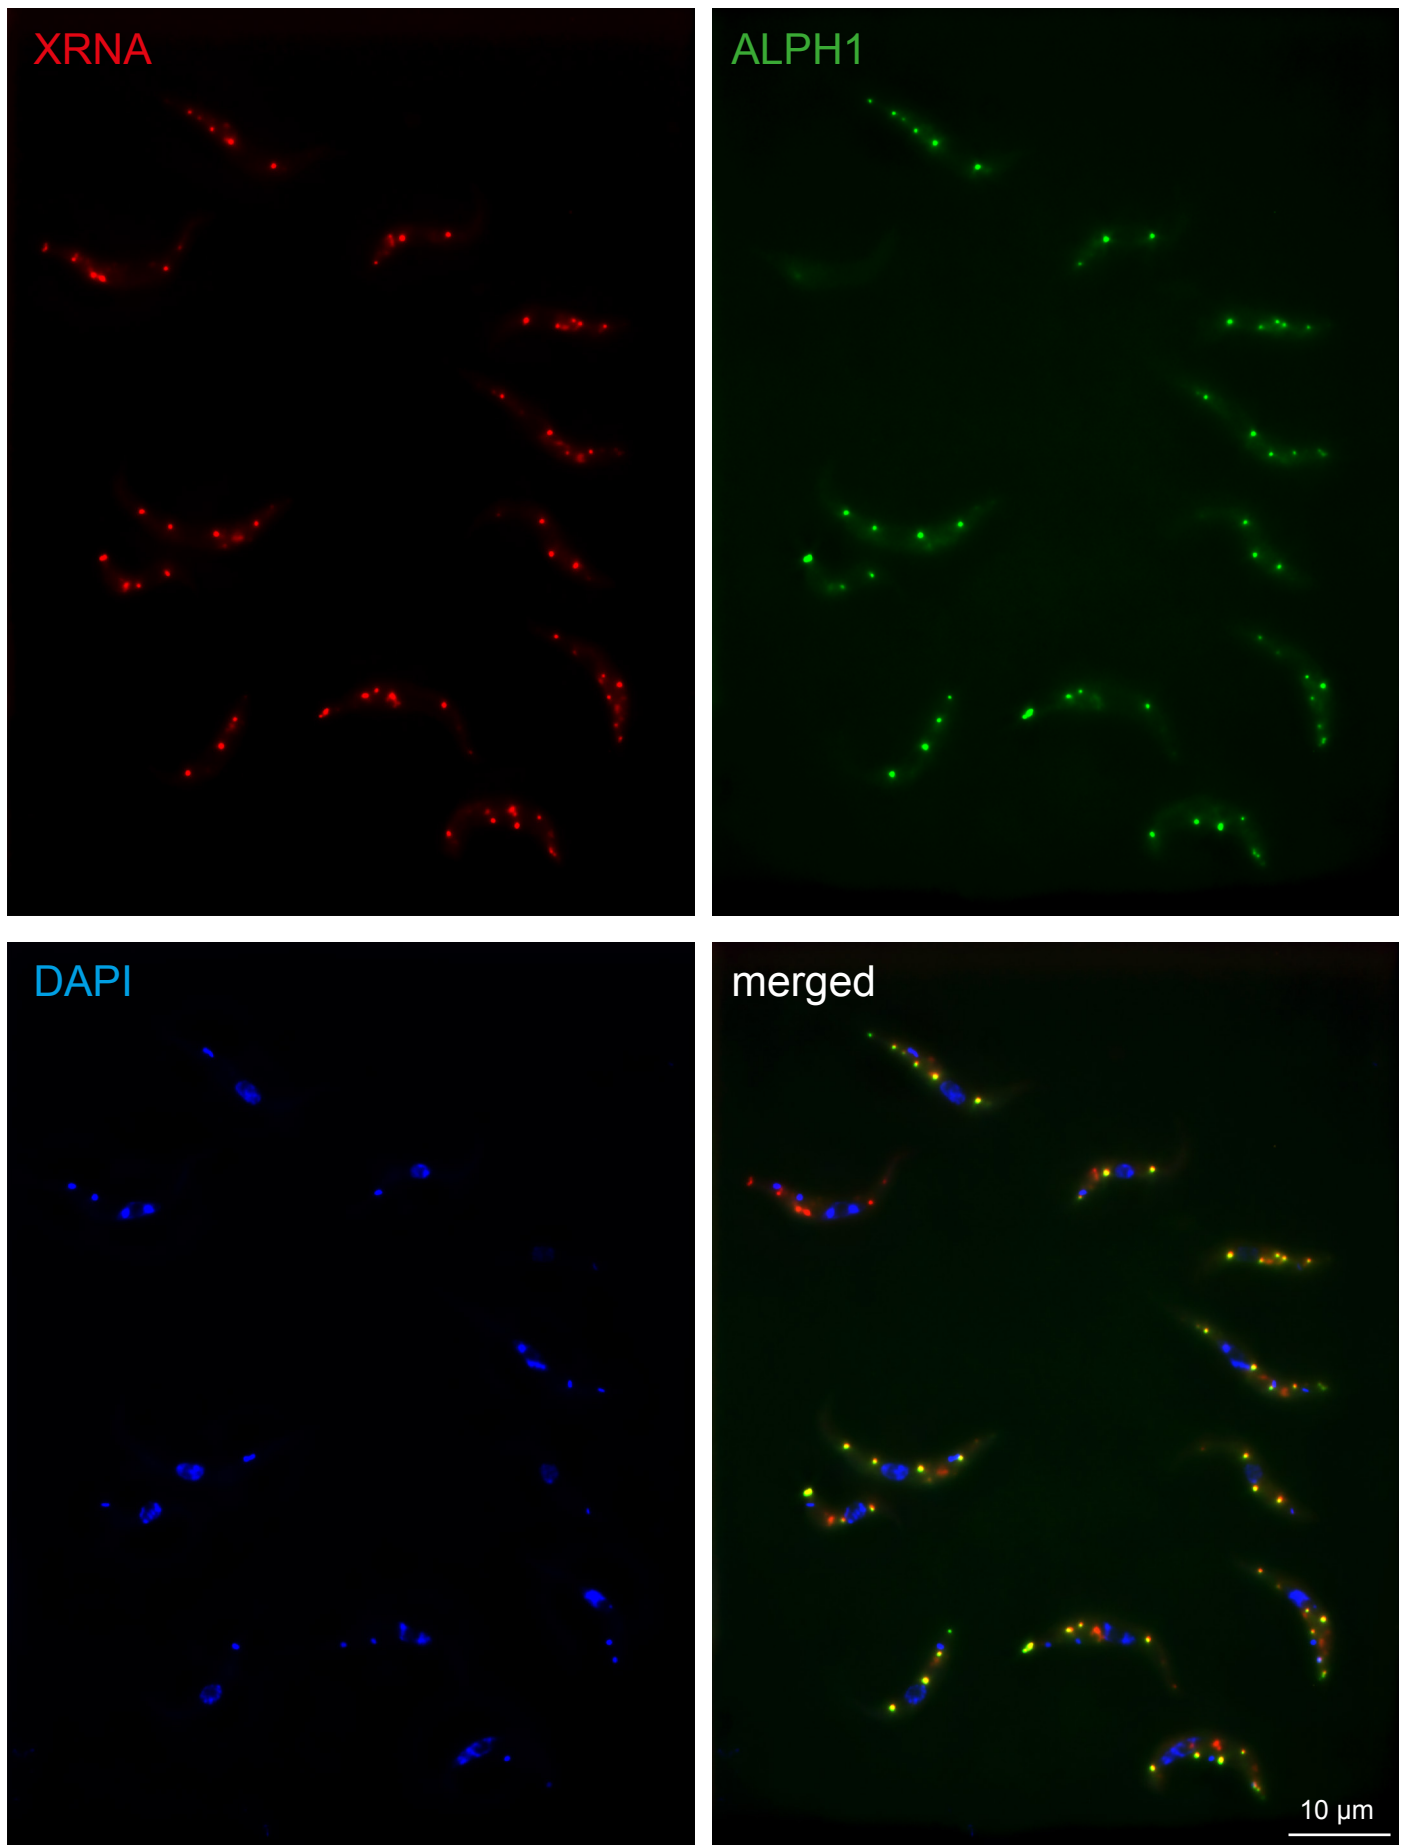

**Figure S7:** Cells co-expressing XRNA-mChFP and ALPH1-eYFP from endogenous loci were treated with starvation (PBS). Note that the expression levels of XRNA-mChFP are very low and thus, the autofluorescence of the lysosome becomes partially visible.
