# Supplementary material for: The ApaH-like phosphatase TbALPH1 is the major mRNA decapping enzyme of trypanosomes
Source: PubMed Central journal article supplement (PMC5491325; doi:10.1371/journal.ppat.1006456), 2017-06-19
Supplement: ppat.1006456.s008.pdf [file ppat.1006456.s008.pdf]

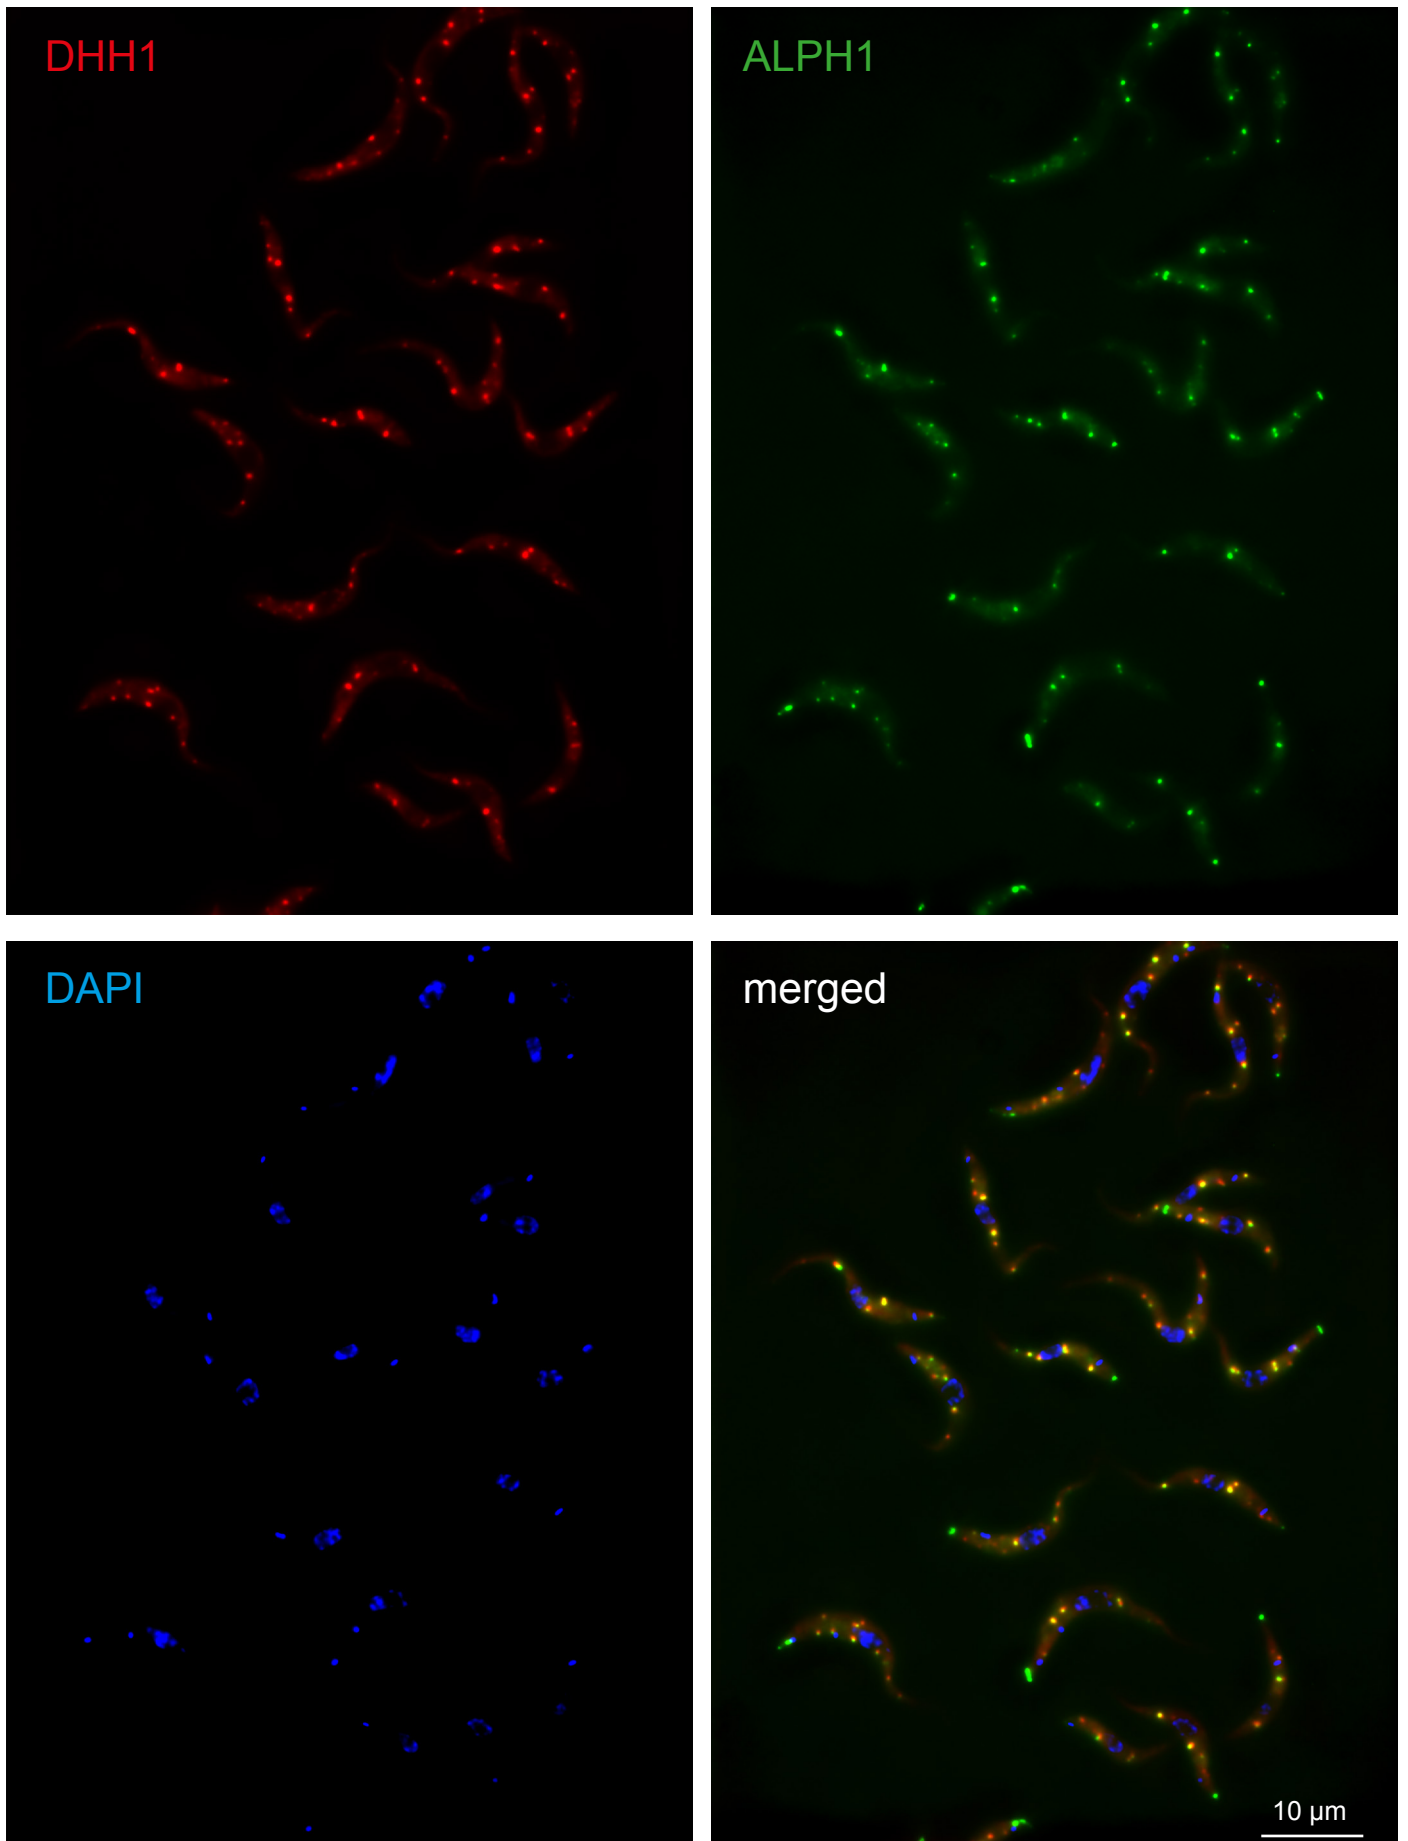

**Figure S8:** Cells co-expressing mChFP-DHH1 and ALPH1-eYFP from endogenous loci were treated with starvation (PBS).
