# Supplementary material for: The ApaH-like phosphatase TbALPH1 is the major mRNA decapping enzyme of trypanosomes
Source: PubMed Central journal article supplement (PMC5491325; doi:10.1371/journal.ppat.1006456), 2017-06-19
Supplement: ppat.1006456.s009.pdf [file ppat.1006456.s009.pdf]

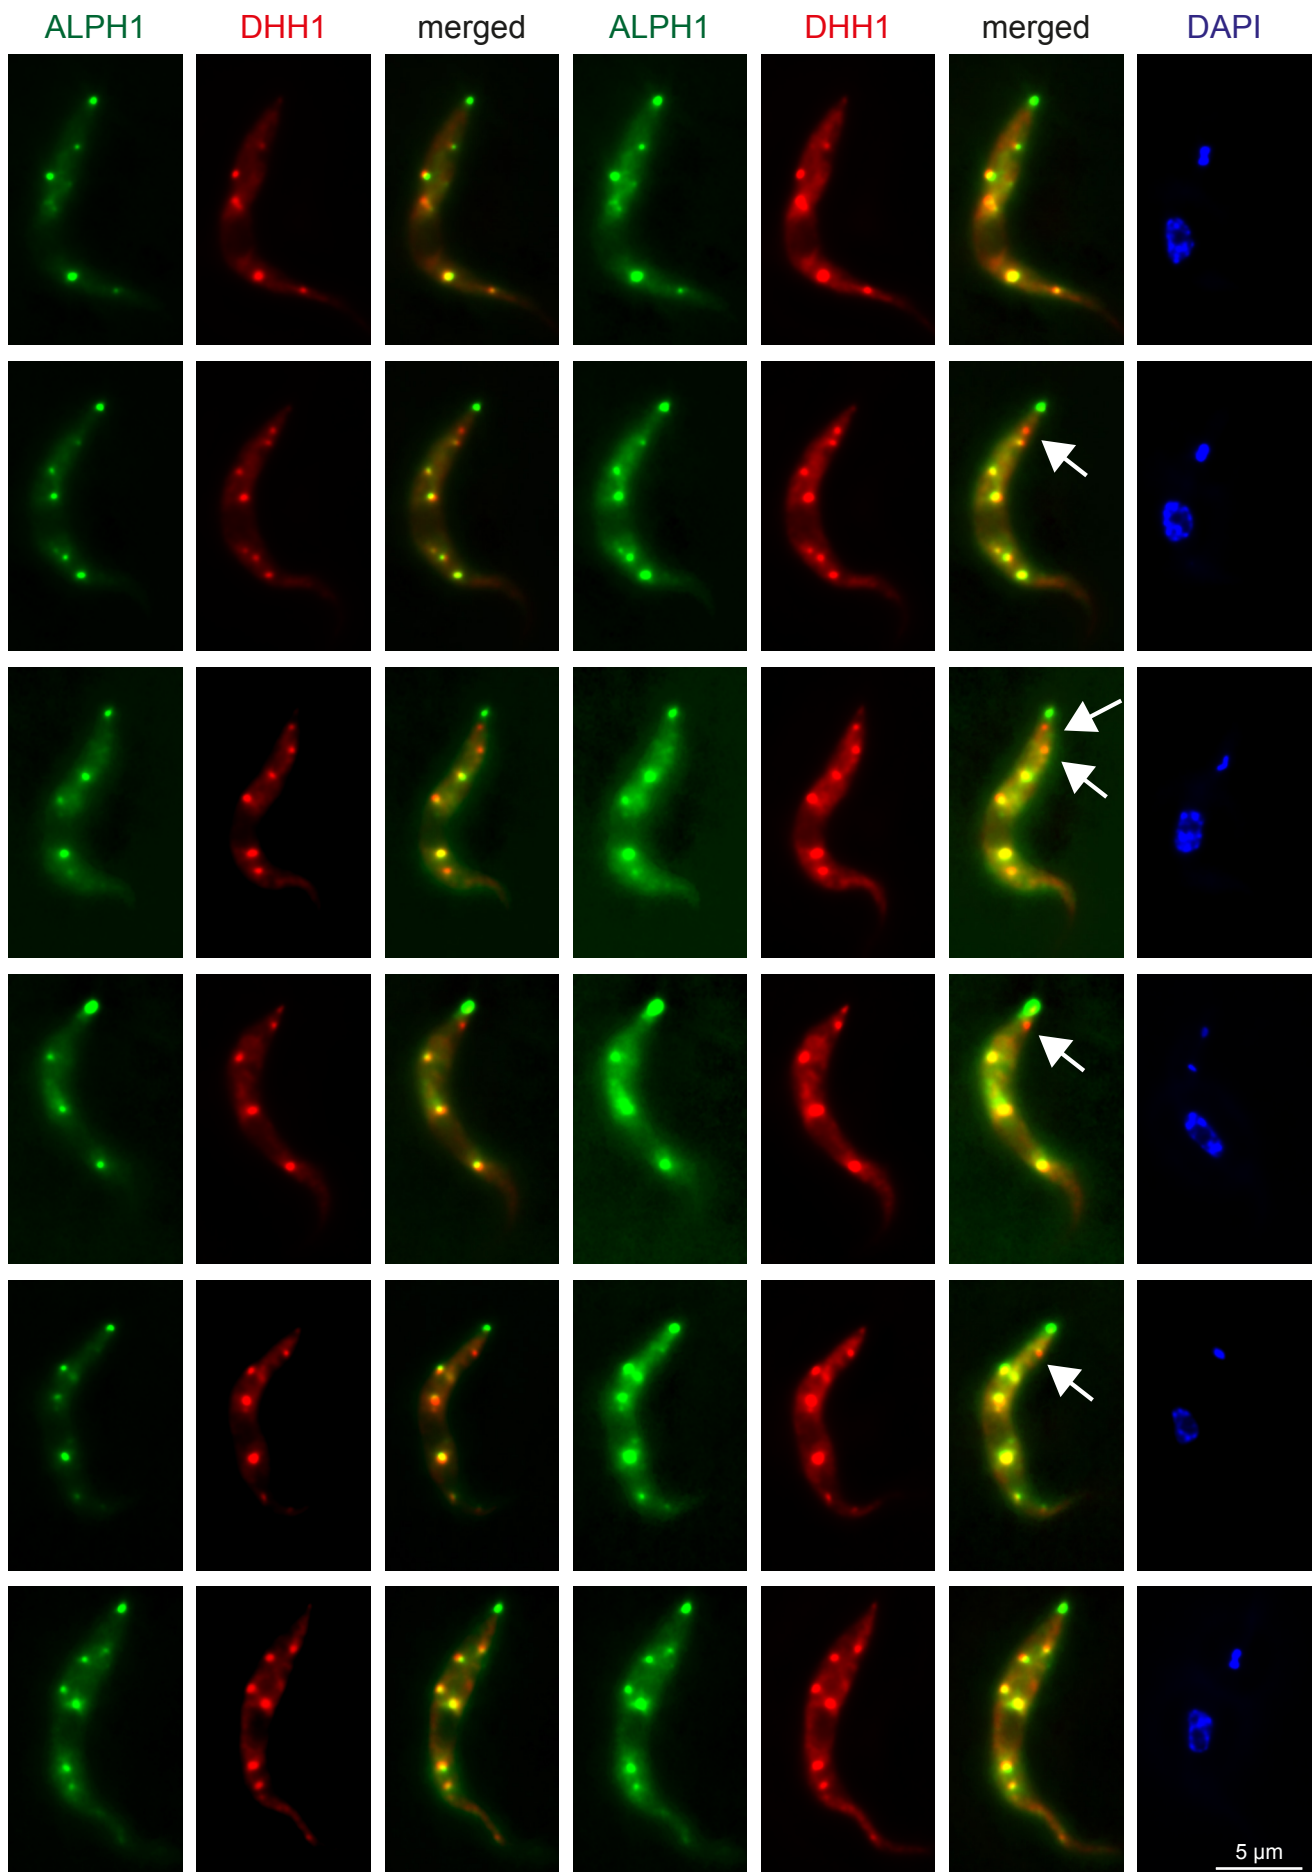

**Figure S9: Examples images of cells co-expressing ALPH1-eYFP and mChFP-DHH1 from the endogenous locus.** For the red and green fluorescence, images are shown at two different levels of brightness. Starvation stress granules that lack ALPH1 are marked with an arrow; these are mostly at the posterior end of the cell.
