# Supplementary material for: The ApaH-like phosphatase TbALPH1 is the major mRNA decapping enzyme of trypanosomes
Source: PubMed Central journal article supplement (PMC5491325; doi:10.1371/journal.ppat.1006456), 2017-06-19
Supplement: ppat.1006456.s010.pdf [file ppat.1006456.s010.pdf]

Figure S10

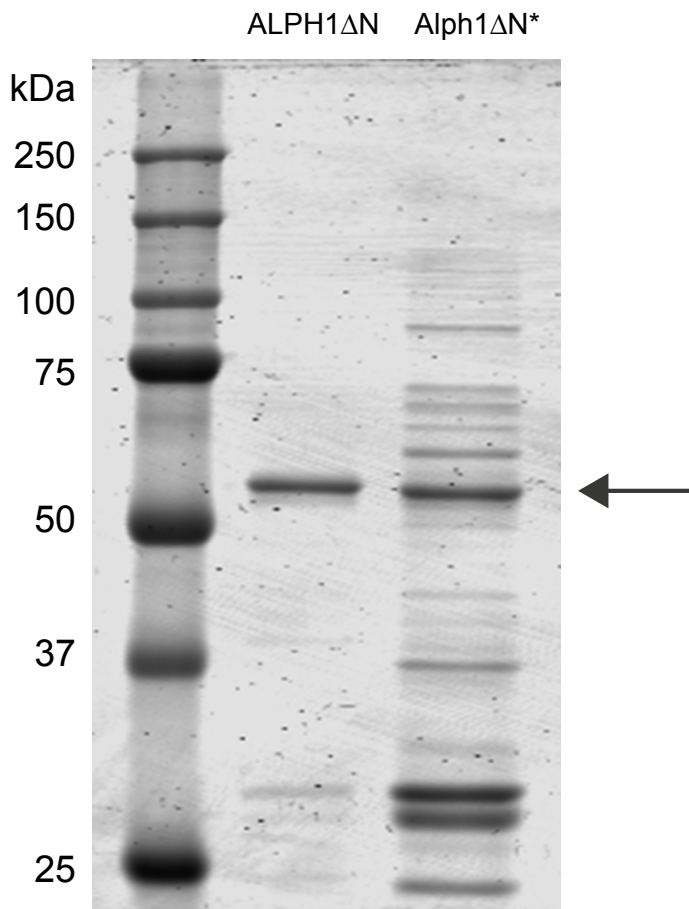

**Figure S10:** Coomassie stained gel loaded with 1  $\mu$ l and 10  $\mu$ l of ALPH1 $\Delta$ N and Alph1 $\Delta$ N\* (arrow), purified from *E. coli*. The expected molecular weight of the histidine fusion protein is 59.6 kDa. Note that Alph1 $\Delta$ N\* could not be expressed to the same high levels as the wild type protein and contains therefore a higher amount of contaminations. However, given that this protein served as a negative control, mainly to control that no bacterial contaminations are responsible for the decapping activity, this higher level of contaminations does not affect the interpretation of the data. For each decapping assay, 2  $\mu$ l of wild type ALPH1 $\Delta$ N and 20  $\mu$ l of Alph1 $\Delta$ N\* were used. This corresponds to roughly 800 ng protein, when estimated from a BSA calibration curve (data not shown).
