# Supplementary material for: The ApaH-like phosphatase TbALPH1 is the major mRNA decapping enzyme of trypanosomes
Source: PubMed Central journal article supplement (PMC5491325; doi:10.1371/journal.ppat.1006456), 2017-06-19
Supplement: ppat.1006456.s012.pdf [file ppat.1006456.s012.pdf]

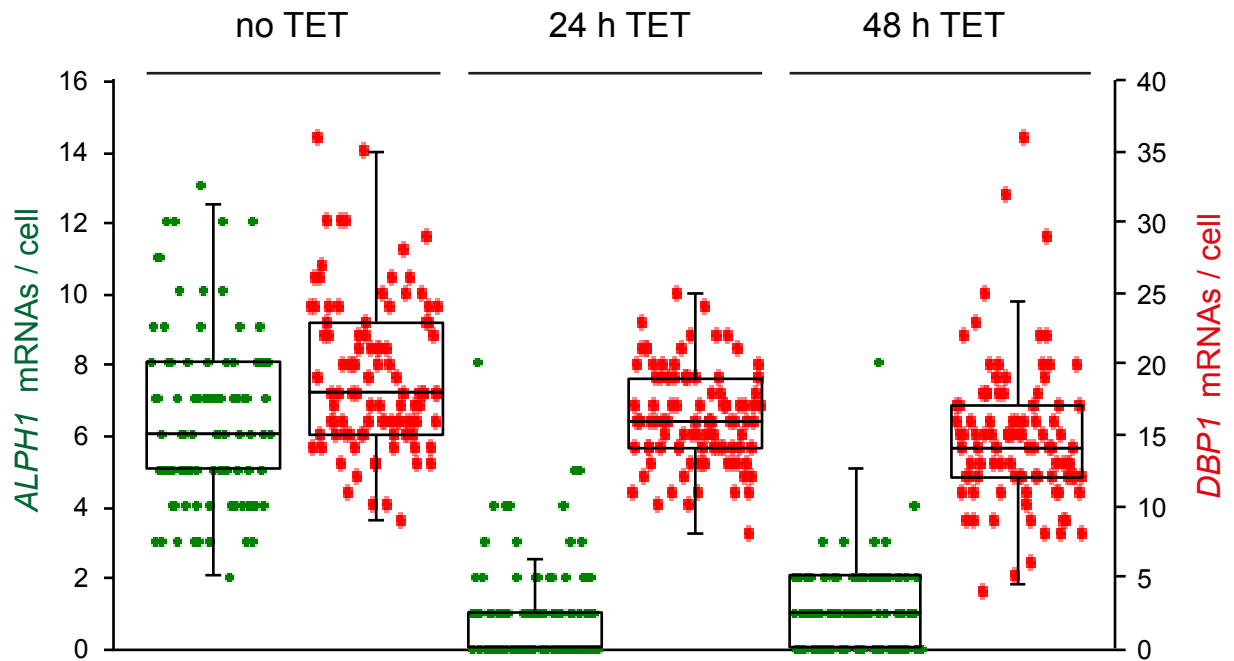

**Figure S12: Reduction in the number of *ALPH1* mRNA molecules after RNAi depletion of *ALPH1* (clone 2).**

*ALPH1* mRNA and *DBP1* mRNA (control) were visualized by dual colour single molecule mRNA FISH (Affymetrix®), using green (*ALPH1*) and red (*DBP1*) fluorescent Affymetrix probe sets. The number of mRNA molecules per cell was quantified after 0, 24 and 48 hours of *ALPH1* RNAi induction. Data are presented as box plot (waist is median; box is IQR; whiskers are  $\pm 1.5$  IQR; only the smallest and largest outliers are shown;  $n = 100$  for each time-point); the number of mRNAs from the individual cells is also presented as green (*ALPH1*) or red (*DBP1*) dots.
